# Supplementary material for: Reducing Uncertainty in Within-Host Parameter Estimates of Influenza Infection by Measuring Both Infectious and Total Viral Load
Source: PLOS journal article supplement (doi:10.1371/journal.pone.0064098), 2013-05-15
Supplement: S1 (10.1371/journal.pone.0064098.s001) [file journal.pone.0064098.s001]

## Supporting information

### Comparing previous estimates of viral clearance rate and viral degradation rate

Here we investigate the biological plausibility of the  $c_h \gg d_{ni}$  assumption, by comparing previous estimates of the viral clearance rate to estimates of the viral degradation rate, for various strains of influenza A:

- Estimates of  $c$  from within-host modelling of *in vivo* data range from  $1.4 d^{-1}$  ( $1/c = 17 h$ ) to  $28.4 d^{-1}$  ( $1/c = 50.7 min$ ) [1–5]. This range does not include estimates of  $c$  from *all* models within these references, as several of those models explicitly include some form of time-varying immune response in addition to the  $c$  parameter. As these studies did not estimate either  $c_h$  or  $d_{inf}$  directly, we treat each estimate of  $c$  as an upper bound on the corresponding estimate of  $c_h$ .
- Daum *et al.* [6] measured virus degradation via rRT-PCR assays — their results suggest a degradation rate of approximately  $0.06$ – $0.19 d^{-1}$ . We do not include their results for influenza stored in viral transport medium (VTM), as Daum *et al.* stated that those results suggested detection of vRNA via rRT-PCR was hindered for virus stored in VTM. Wang *et al.* [7] found that there was no significant change in rRT-PCR viral concentration when virus was stored for up to 3 days at room temperature in various storage media. Schulze-Horsel *et al.* [8] measured  $d_{ni}$  *in vitro* using HA assays (which measure viral concentration via the hemagglutinin surface protein rather than via internal vRNA), and found values of  $0 d^{-1}$ ,  $0 d^{-1}$ , and  $0.24 d^{-1}$  for three different strains of influenza. Möhler *et al.* [9] measured the degradation rate of influenza (via HA assays) to be  $0.072 d^{-1}$ .

These estimates support the biological plausibility of the  $c_h \gg d_{ni}$  assumption.

### Further details regarding data fitting

#### Fixed parameter and biologically realistic ranges for fitted parameters

We fix  $k = 3 d^{-1}$ , consistent with estimates obtained when fitting models (with normal or log-normal delay distributions for  $L$  and  $I$ ) to *in vitro* data [4, 10]. We investigated fitting for the latent period,  $k$ , but found that not only was  $k$  unidentifiable in both models, fitting rather than fixing  $k$  also significantly reduced model inference capability for several other parameters (data not shown).

For all fitted parameters, we specify a range of biologically plausible values (Table S1) which restrict the parameter space searchable by the genetic algorithm.

#### Estimating a lower bound for $V_{inf}^{TCID}(0)$

Theoretically, influenza infection could be initiated by as little as a single infectious virion in the URT. In order to set the lower bound for  $V_{inf}^{TCID}(0)$  to a value that corresponds to 1 infectious virion in the URT, we need to estimate:

1. the number of infectious virions that correspond to 1 TCID<sub>50</sub> (Handel *et al.* [2] estimated this to be somewhere in the range 1-100),

2. the conversion factor between *infectious virions/ml* in the URT and *infectious virions/ml* in nasal wash samples when they are assayed (Handel *et al.* [2] estimated that nasal wash sample concentrations were somewhere in the range of 1-100 times smaller than corresponding URT concentrations, while Beauchemin *et al.* [11] found that if a sample was frozen and then thawed before being assayed, there was about a 10-fold reduction in infectious viral load as measured via plaque assay),
3. the volume of the ferret URT (we estimate this to be approximately 1 *ml* based on URT volumes [12] of mammals with similar body weight to the ferrets in the Guarnaccia *et al.* experiments; i.e. 500–1500 *g*).

Based on these rough estimates, we assume a conservative lower bound of  $10^{-6}$   $TCID_{50}/ml$  for  $V_{inf}^{TCID}(0)$ .

## References

1. Baccam P, Beauchemin CAA, Macken CA, Hayden FG, Perelson AS (2006) Kinetics of influenza A virus infection in humans. *Journal of Virology* 80: 7590–9.
2. Handel A, Longini IM, Antia R (2007) Neuraminidase inhibitor resistance in influenza: assessing the danger of its generation and spread. *PLoS Computational Biology* 3: e240.
3. Miao H, Hollenbaugh JA, Zand MS, Holden-Wiltse J, Mosmann TR, et al. (2010) Quantifying the early immune response and adaptive immune response kinetics in mice infected with influenza A virus. *Journal of Virology* 84: 6687–98.
4. Holder BP, Beauchemin CAA (2011) Exploring the effect of biological delays in kinetic models of influenza within a host or cell culture. *BMC Public Health* 11 Suppl 1: S10.
5. Smith AM, Adler FR, McAuley JL, Gutenkunst RN, Ribeiro RM, et al. (2011) Effect of 1918 PB1-F2 Expression on Influenza A Virus Infection Kinetics. *PLoS Computational Biology* 7: e1001081.
6. Daum LT, Worthy SA, Yim KC, Nogueras M, Schuman RF, et al. (2010) A clinical specimen collection and transport medium for molecular diagnostic and genomic applications. *Epidemiology and Infection* : 1–10.
7. Wang X, Zoueva O, Zhao J, Ye Z, Hewlett I (2011) Stability and infectivity of novel pandemic influenza A (H1N1) virus in blood-derived matrices under different storage conditions. *BMC Infectious Diseases* 11: 354.
8. Schulze-Horsel J, Schulze M, Agalaridis G, Genzel Y, Reichl U (2009) Infection dynamics and virus-induced apoptosis in cell culture-based influenza vaccine production-Flow cytometry and mathematical modeling. *Vaccine* 27: 2712–22.
9. Möhler L, Flockerzi D, Sann H, Reichl U (2005) Mathematical model of influenza A virus production in large-scale microcarrier culture. *Biotechnology and Bioengineering* 90: 46–58.
10. Holder BP, Simon P, Liao LE, Abed Y, Bouhy X, et al. (2011) Assessing the in vitro fitness of an oseltamivir-resistant seasonal A/H1N1 influenza strain using a mathematical model. *PLoS ONE* 6: e14767.
11. Beauchemin CAA, McSharry JJ, Drusano GL, Nguyen JT, Went GT, et al. (2008) Modeling amantadine treatment of influenza A virus in vitro. *Journal of Theoretical Biology* 254: 439–51.

12. Ménache MG, Hanna LM, Gross EA, Lou SR, Zinreich SJ, et al. (1997) Upper Respiratory Tract Surface Areas and Volumes of Laboratory Animals and Humans: Considerations for Dosimetry Models. *Journal of Toxicology and Environmental Health, Part A* 50: 475–506.
13. Smith AM, Perelson AS (2011) Influenza A virus infection kinetics: quantitative data and models. *Wiley Interdisciplinary Reviews: Systems Biology and Medicine* 3: 429–445.
14. Beauchemin CAA, Handel A (2011) A review of mathematical models of influenza A infections within a host or cell culture: lessons learned and challenges ahead. *BMC Public Health* 11 Suppl 1: S7.
15. Saenz RA, Quinlivan M, Elton D, Macrae S, Blunden AS, et al. (2010) Dynamics of influenza virus infection and pathology. *Journal of Virology* 84: 3974–83.
16. Pawelek KA, Huynh GT, Quinlivan M, Cullinane A, Rong L, et al. (2012) Modeling within-host dynamics of influenza virus infection including immune responses. *PLoS Computational Biology* 8: e1002588.
17. Arndt U, Wennemuth G, Barth P, Nain M, Al-Abed Y, et al. (2002) Release of macrophage migration inhibitory factor and CXCL8/interleukin-8 from lung epithelial cells rendered necrotic by influenza A virus infection. *Journal of Virology* 76: 9298.
18. Zhirnov O, Klenk HD (2003) Human influenza A viruses are proteolytically activated and do not induce apoptosis in CACO-2 cells. *Virology* 313: 198–212.
19. Horsfall FL (1954) On the reproduction of influenza virus. Quantitative studies with procedures which enumerate infective and hemagglutinating virus particles. *The Journal of Experimental Medicine* 100: 135–161.
20. Paucker K, Henle W (1955) Studies on host-virus interactions in the chick embryo-influenza virus system. XI. The effect of partial inactivation of standard seed virus at 37C upon the progeny. *The Journal of Experimental Medicine* 101: 479–492.
21. Gaush CR, Smith TF (1968) Replication and plaque assay of influenza virus in an established line of canine kidney cells. *Applied Microbiology* 16: 588–94.
22. Orthel FW (1972) Influenza virus titrations and the inhibitor of hemagglutination in normal allantoic fluid. *Archiv für die gesamte Virusforschung* 38: 347–56.

## Tables

Table S1. Biologically realistic parameter ranges.

| Parameter           | Bounds               | Source <sup>a</sup>                                                                                                                                                                                                                                                                                                          |
|---------------------|----------------------|------------------------------------------------------------------------------------------------------------------------------------------------------------------------------------------------------------------------------------------------------------------------------------------------------------------------------|
| $V_{inf}^{TCID}(0)$ | $[10^{-6}, 10^3]$    | Upper bound informed by initial $V_{inf}^{TCID}$ measurements within the Guarnaccia <i>et al.</i> (under review) data; lower bound based on an estimate of the lowest possible TCID <sub>50</sub> value that corresponds to a single infectious virion in the URT (see “Estimating a lower bound for $V_{inf}^{TCID}(0)$ ”). |
| $\rho(0)$           | $[10^{-1}, 10^{12}]$ | Based on the variability of $\rho(t)$ within the Guarnaccia <i>et al.</i> (under review) data <sup>b</sup> .                                                                                                                                                                                                                 |
| $\beta$             | $[10^{-9}, 10^{-1}]$ | Previous <i>in vivo</i> and <i>in vitro</i> modelling estimates of $\beta$ [1–3, 5, 8, 9, 11, 15, 16].                                                                                                                                                                                                                       |
| $\delta$            | $[0.24, 24]$         | This range corresponds to average productively infected cell lifetimes (i.e. $1/\delta$ ) from 1 <i>h</i> to 100 <i>h</i> , consistent with previous <i>in vitro</i> observations [9, 17, 18] as well as both <i>in vivo</i> and <i>in vitro</i> model-fitting estimates [1–5, 8, 9, 11].                                    |
| $p$                 | $[10^{-6}, 10^6]$    | Previous <i>in vivo</i> and <i>in vitro</i> modelling estimates of $p$ [1–5, 8, 9, 11, 15, 16].                                                                                                                                                                                                                              |
| $c$                 | $[10^{-1}, 10^3]$    | Previous <i>in vivo</i> estimates for $c$ obtained from target cell-limited models in which infection progress is limited by the availability of susceptible cells, rather than by immune response dynamics [1–5].                                                                                                           |
| $c_h$               | $[10^{-2}, 10^3]$    | Previous <i>in vivo</i> estimates for $c$ obtained from target cell-limited models in which infection progress is limited by the availability of susceptible cells, rather than by immune response dynamics [1–5] <sup>c</sup> .                                                                                             |
| $d_{inf}$           | $[2, 8]$             | Previous <i>in vitro</i> estimates of $d_{inf}$ [8, 10, 11, 19–22].                                                                                                                                                                                                                                                          |
| $\xi$               | $[10^{-2}, 10^7]$    | Based on the variability of $\rho(t)$ within the Guarnaccia <i>et al.</i> (under review) data.                                                                                                                                                                                                                               |

Lower and upper bounds for each fitted parameter.

<sup>a</sup>For reviews of parameter estimates obtained by within-host modelling influenza studies, see [13, 14].

<sup>b</sup>We use an upper bound that is several orders of magnitude higher than the highest measured  $\rho(t)$  value in the data, in order to allow for the possibility that many infectious virions could become non-infectious during transmission from one ferret to another.

<sup>c</sup>We use a smaller lower bound for  $c_h$  than that used for  $c$ , as we expect  $c_h$  to be somewhat lower than previous estimates of  $c$ , since those estimates implicitly include both  $c_h$  and  $d_{inf}$ .
